# Supplementary material for: Optimal use of the Prede POM sky radiometer for aerosol, water vapor, and ozone retrievals
Source: Copernicus journal article supplement (doi:10.5194/amt-14-3395-2021), 2021-05-11
Supplement: Supplementary file 1 [file amt-14-3395-2021-supplement.pdf]

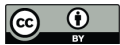

*Supplement of*

## **Optimal use of the Prede POM sky radiometer for aerosol, water vapor, and ozone retrievals**

**Rei Kudo et al.**

*Correspondence to:* Rei Kudo ([reikudo@mri-jma.go.jp](mailto:reikudo@mri-jma.go.jp))

The copyright of individual parts of the supplement might differ from the article licence.

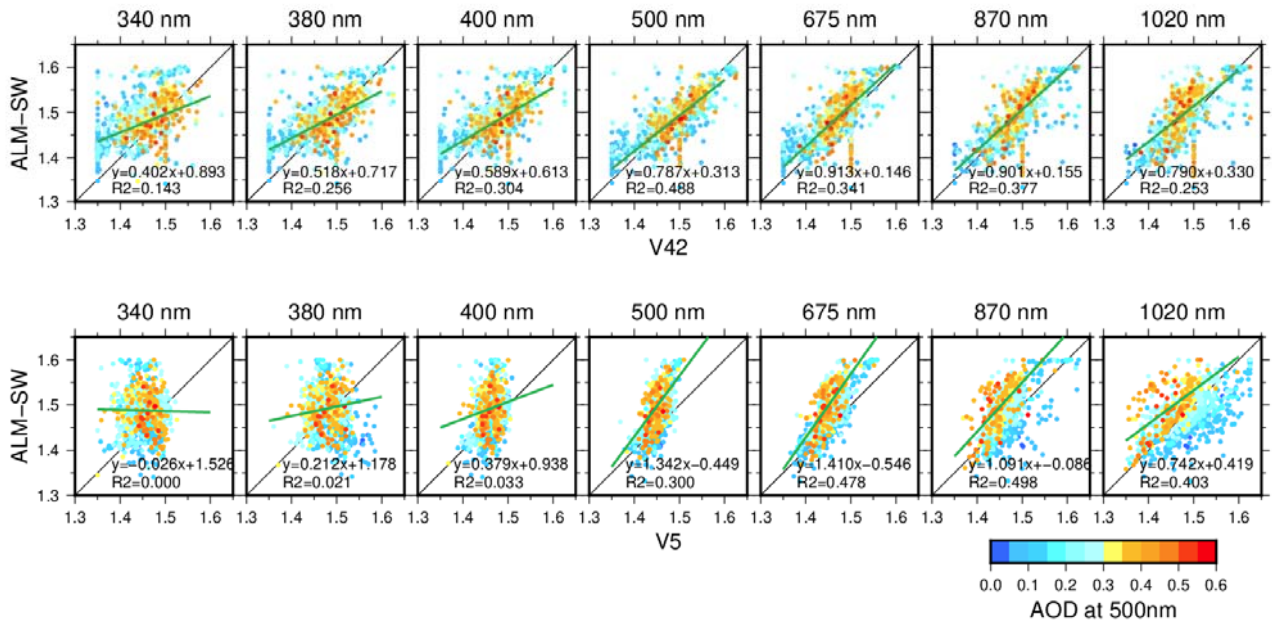

Figure S1: Comparisons of the real part of the refractive index between ALM-SW, V42, and V5. Colors indicate the aerosol optical depth at 500 nm. “ $y=ax+b$ ” and “ $R^2$ ” are the linear fitting and the coefficient of the determination for the data of the aerosol optical depth more than 0.3.

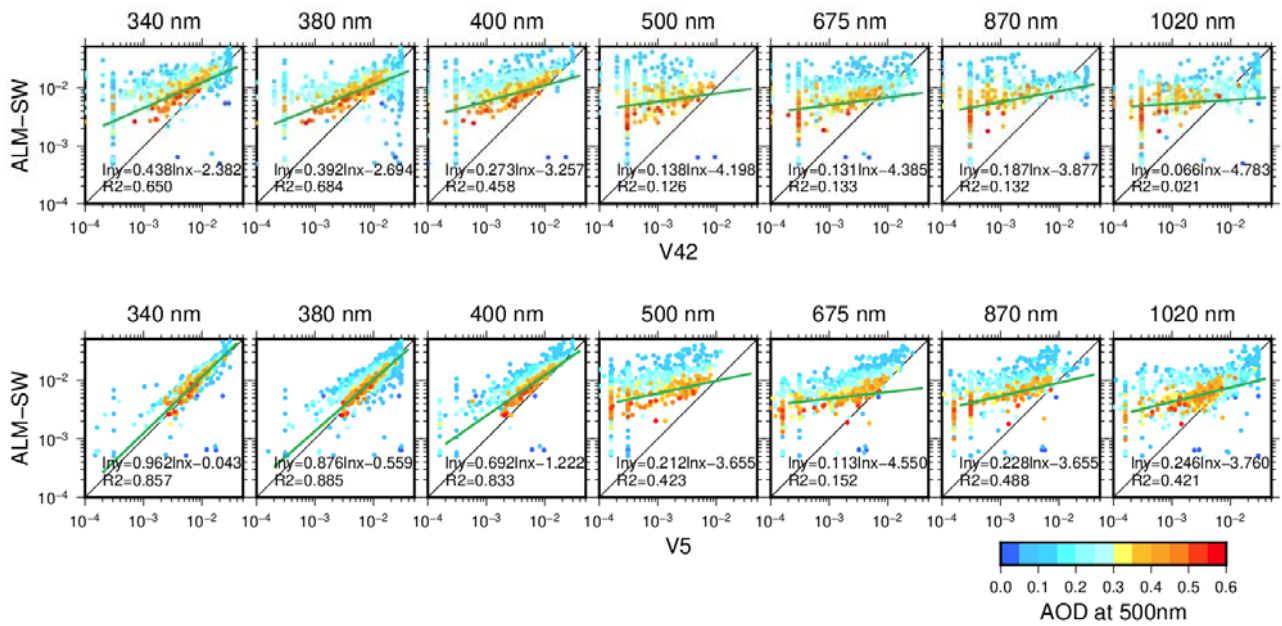

5

Figure S2: Comparisons of the imaginary part of the refractive index between ALM-SW, V42, and V5. Colors indicate the aerosol optical depth at 500 nm. “ $y=ax+b$ ” and “R2” are the linear fitting and the coefficient of the determination for the data of the aerosol optical depth more than 0.3.

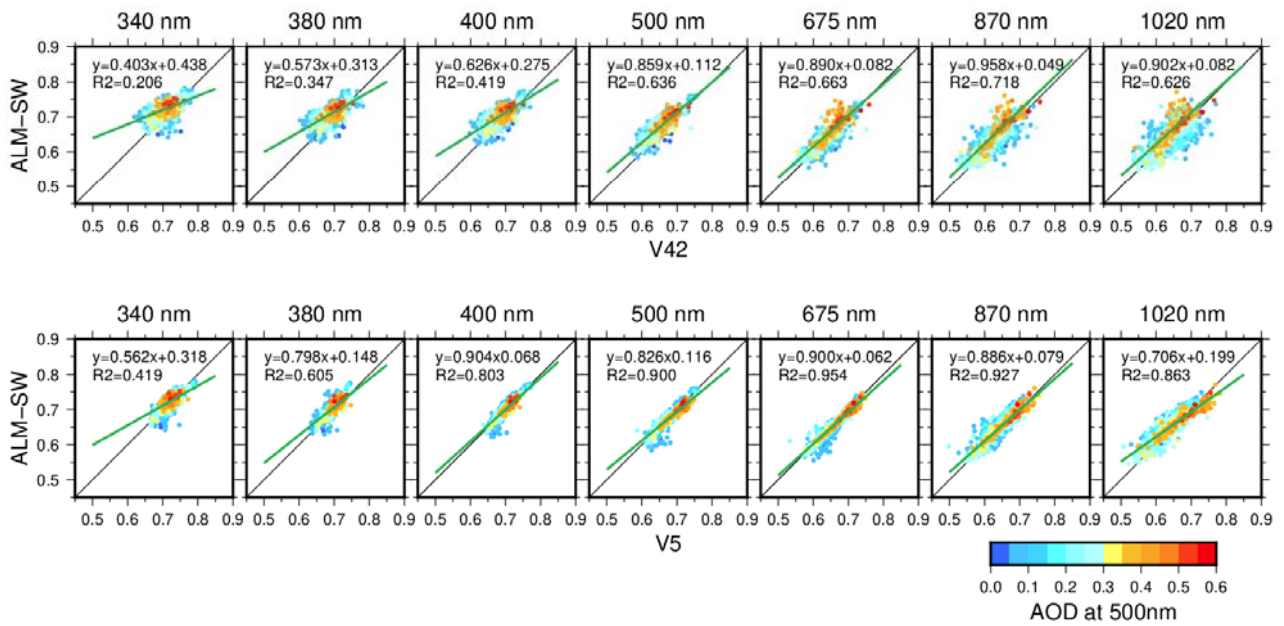

10 Figure S3: Comparisons of the asymmetry factor between ALM-SW, V42, and V5. Colors indicate the aerosol optical depth at 500 nm. “ $y=ax+b$ ” and “R<sup>2</sup>” are the linear fitting and the coefficient of the determination for the data of the aerosol optical depth more than 0.3.

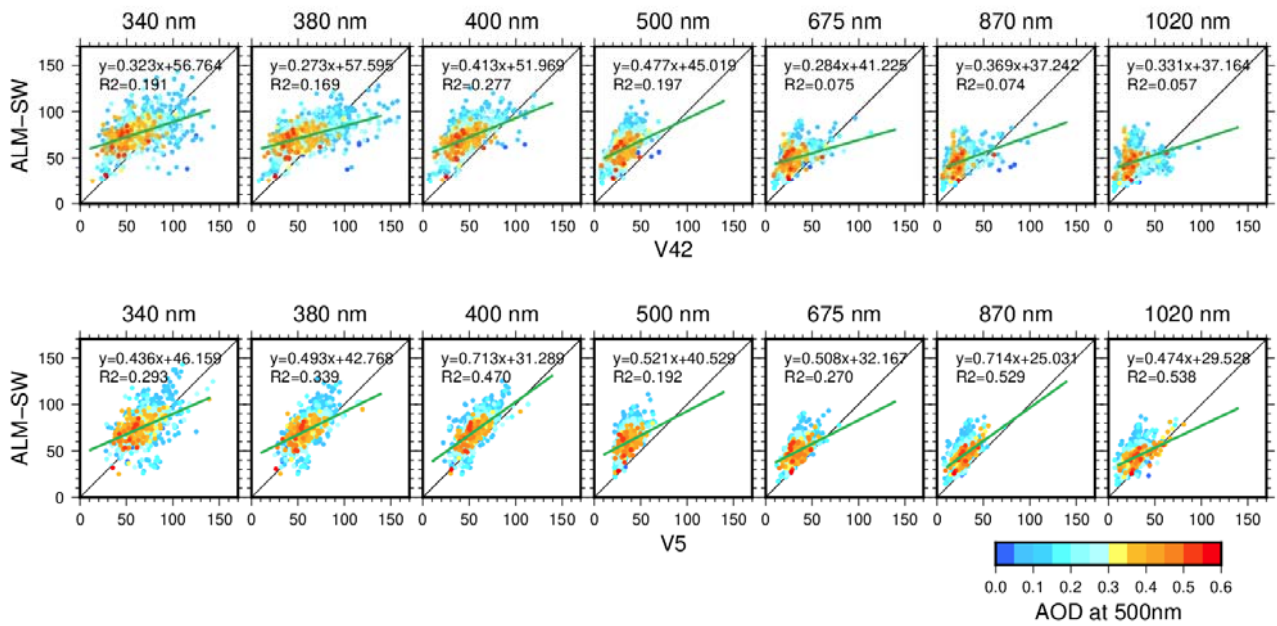

15 Figure S4: Comparisons of the lidar ratio between ALM-SW, V42, and V5. Colors indicate the aerosol optical depth at 500 nm. “ $y=ax+b$ ” and “R<sup>2</sup>” are the linear fitting and the coefficient of the determination for the data of the aerosol optical depth more than 0.3.
